# Supplementary material
Source: publisher figshare collection journal article supplement (https://tandf.figshare.com/articles/dataset/_/19127937)
Supplement: Supplementary file 1 [file 1]

Vulnerability context - logistic regression models

| 1. Crop pests and diseases | 1. Crop failure from drought |
| --- | --- |
|  |  |
|  |  |
|  |  |
|  |  |
| 1. Soil erosion | 1. Livestock diseases |
|  |  |
|  |  |
|  |  |
|  |  |
| 1. Getting poor price for produce | 1. Illness and/or family problems |
|  |  |
|  |  |
|  |  |
|  |  |
| 1. Land shortage | 1. Transportation problems |
|  |  |
|  |  |
|  |  |
|  |  |
| 1. Lack of information and/or understanding | 1. Lack of tools and/or equipment |
|  |  |
|  |  |
|  |  |
|  |  |
| 1. Sensitivity – food shortage | 1. Sensitivity – water shortage |
|  |  |
